# Supplementary material for: Inertia-driven spin switching in antiferromagnets
Source: Springer Nature journal article supplement (doi:10.1038/nphys1369), 2009-08-23
Supplement: 41567_2009_BFnphys1369_MOESM5_ESM.pdf [file 41567_2009_BFnphys1369_MOESM5_ESM.pdf]

## Supplementary Information on Theoretical Modeling of Inertia-Driven Spin Switching in Antiferromagnets

The dynamics of an antiferromagnet with two sublattices can be described on the basis of a system of two Landau–Lifshitz equations for the sublattice magnetizations  $\mathbf{M}_1$  and  $\mathbf{M}_2$ ,  $|\mathbf{M}_1|=|\mathbf{M}_2|=M_s/2$ , where  $M_s$  is the maximum possible value of the magnetization of the antiferromagnet when the sublattices are parallel. It is more convenient to use the equations for the irreducible vectors, the net magnetization  $\mathbf{M}=\mathbf{M}_1+\mathbf{M}_2$  and the antiferromagnetic vector  $\mathbf{L}=\mathbf{M}_1-\mathbf{M}_2$ , subject to the constraints  $(\mathbf{M}\cdot\mathbf{L})=0$ ,  $\mathbf{M}^2+\mathbf{L}^2=M_s^2/2$ . The equations for  $\mathbf{M}$  and  $\mathbf{L}$  can be written as  $d\mathbf{L}/dt=\gamma(\mathbf{L}\times\mathbf{H}_M) +\gamma(\mathbf{M}\times\mathbf{H}_L)$ ,  $d\mathbf{M}/dt=\gamma(\mathbf{L}\times\mathbf{H}_L)+\gamma(\mathbf{M}\times\mathbf{H}_M)$ , where  $\mathbf{H}_L=-\partial W/\partial\mathbf{L}$  and  $\mathbf{H}_M=-\partial W/\partial\mathbf{M}$ ,  $W$  is the energy of the antiferromagnet, written in terms of the vectors  $\mathbf{M}$  and  $\mathbf{L}$ . Using the conditions  $|\mathbf{M}|\ll|\mathbf{L}|$  which is natural for antiferromagnets (we will verify the condition below), and the inequality for the material parameters  $H_e \gg |\mathbf{H}|$ ,  $|\mathbf{H}_D| \gg H_a$ , where  $H_e$  and  $H_a$  are exchange field and anisotropy field, respectively, and the vectors  $\mathbf{H}$  and  $\mathbf{H}_D$  determine the external field and Dzyaloshinskii field, respectively, we can neglect the dependence of the anisotropy energy  $W_a$  on  $\mathbf{M}$  and the energy takes the form  $W=(H_e/2 M_s)\mathbf{M}^2-\mathbf{H}_{\text{tot}}\cdot\mathbf{M}+W_a(\mathbf{L})$ , where  $\mathbf{H}_{\text{tot}}=\mathbf{H}+\mathbf{H}_D$ . The second term in the right hand side of the equation for  $d\mathbf{L}/dt$  is of the order of  $MH_a$ , and is small compared to the first term, that is of order  $H_eM^2$  or  $MH_D$ . This leads to an essential simplification: the vector  $\mathbf{M}$  appears to be only a slave variable and is determined by the vector  $\mathbf{L}$  and its time derivative, as follows,  $\mathbf{M}=(M_s/H_e)[\mathbf{H}_{\text{tot}}-\mathbf{I}(\mathbf{H}_{\text{tot}}\cdot\mathbf{I})+(\mathbf{L}\times d\mathbf{L}/dt)/\gamma]$ , where the antiferromagnetic unit vector  $\mathbf{I}=\mathbf{L}/|\mathbf{L}|$  is

introduced. Then, excluding  $\mathbf{M}$  from the equation for  $d\mathbf{M}/dt$ , one can obtain the second order dynamical equation for the unit vector  $\mathbf{l}$  only. The equation for  $\mathbf{l}$  is too long to be written here, but can be obtained through the variation of the Lagrangian (see equation 1 in the manuscript).

It is worth discussing here the condition  $|\mathbf{M}| \ll |\mathbf{L}|$  which is a key point in deriving the sigma-model equation. To comply with it, we need to satisfy not only the natural condition  $|\mathbf{H}_{\text{tot}}| \ll H_e$ , but the inequality  $|d\mathbf{l}/dt| \ll \gamma H_e$  as well. For the description of free spin oscillations, these two conditions are in fact equivalent, but the last one could be a much more serious limitation for the usage of the sigma-model for the problem of ultrafast pulse pumping, where the characteristic time scale  $\Delta t$  is much shorter than the spin wave period  $2\pi/\omega$ . For typical orthoferrites,  $H_e = 1.3 \cdot 10^3$  T, the value of  $\gamma H_e$  exceed 30 THz, and the sigma-model is adequate even for pulse durations like 30 fs.

In equation (3), the anisotropy energy  $W_a$  is modelled by a standard expansion over components of the vector  $\mathbf{l}$  till fourth order. For a magnetic field pulse of short duration  $\Delta t \ll 1/\omega$ , equation 3 was solved numerically and analytically, with replacing the real pulse shape by a Dirac delta-function,  $H(t) \rightarrow \delta(t) H_p \Delta t = \delta(t) \int H(t) dt$ . Then before ( $t < 0$ ) and after ( $t > 0$ ) the action of the pulse, the spin dynamics is described by equation 2 with  $H(t) = 0$ . Assuming  $\varphi = 0$  at  $t < 0$ , it is easy to find the initial conditions of the form,  $\varphi = 0$ ,  $d\varphi/dt = \gamma^2 H_p H_D \Delta t / \sin\theta_0$ , which gives the solution of equation 4 in the same form of a damped nonlinear oscillation, as in Fig. 3.
